# Supplementary material for: M(II)Al4 Type Layered Double Hydroxides—Preparation Using Mechanochemical Route, Structural Characterization and Catalytic Application
Source: MDPI journal article supplement (doi:10.3390/ma14174880), 2021-08-27
Supplement: s1 [file s1]

Supplementary Information

# M(II)Al<sub>4</sub> Type Layered Double Hydroxides—Preparation Using Mechanochemical Route, Structural Characterization and Catalytic Application

Márton Szabados <sup>1,2</sup>, Adél Anna Ádám <sup>2</sup>, Zsolt Kása <sup>2</sup>, Kornélia Baán <sup>3</sup>, Róbert Mucsi <sup>3</sup>, András Sági <sup>3</sup>, Zoltán Kónya <sup>3,4</sup>, Ákos Kukovecz <sup>3</sup> and Pál Sipos <sup>2,5,\*</sup>

<sup>1</sup> Department of Organic Chemistry, University of Szeged, Dóm tér 8, H-6720 Szeged, Hungary; szabados.marton@chem.u-szeged.hu

<sup>2</sup> Material and Solution Structure Research Group, Institute of Chemistry, University of Szeged, Aradi Vértanúk tere 1, H-6720 Szeged, Hungary; adeladam@chem.u-szeged.hu (A.A.Á.); kasa.zsolt@chem.u-szeged.hu (Z.K.)

<sup>3</sup> Department of Applied and Environmental Chemistry, University of Szeged, Rerrich B. tér 1, H-6720 Szeged, Hungary; kornelia.baan@chem.u-szeged.hu (K.B.); muule93@gmail.com (R.M.); sapia@chem.u-szeged.hu (A.S.); konya@chem.u-szeged.hu (Z.K.); kakos@chem.u-szeged.hu (Á.K.)

<sup>4</sup> MTA-SZTE Reaction Kinetics and Surface Chemistry Research Group, Rerrich B tér 1, H-6720 Szeged, Hungary

<sup>5</sup> Department of Inorganic and Analytical Chemistry, University of Szeged, Dóm tér 7, H-6720 Szeged, Hungary

\* Correspondence: sipos@chem.u-szeged.hu

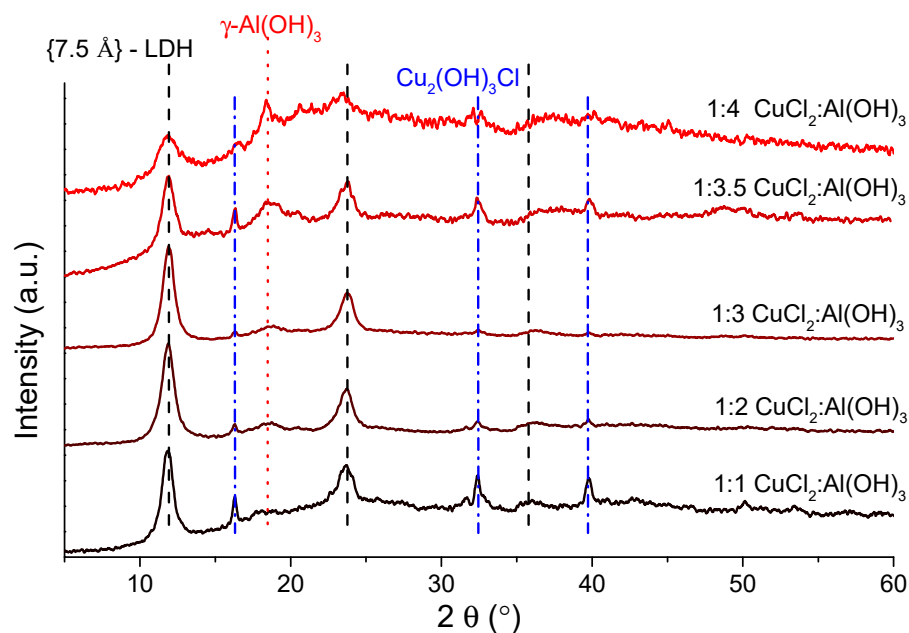

**Figure S1.** XRD patterns of the CuAl<sub>4</sub>-Cl-LDH solids obtained using different initial Cu:Al molar ratios (reaction conditions: 96 h stirring, 90 °C, 6 h pre-milling). The basal spacing is shown in curly brackets.

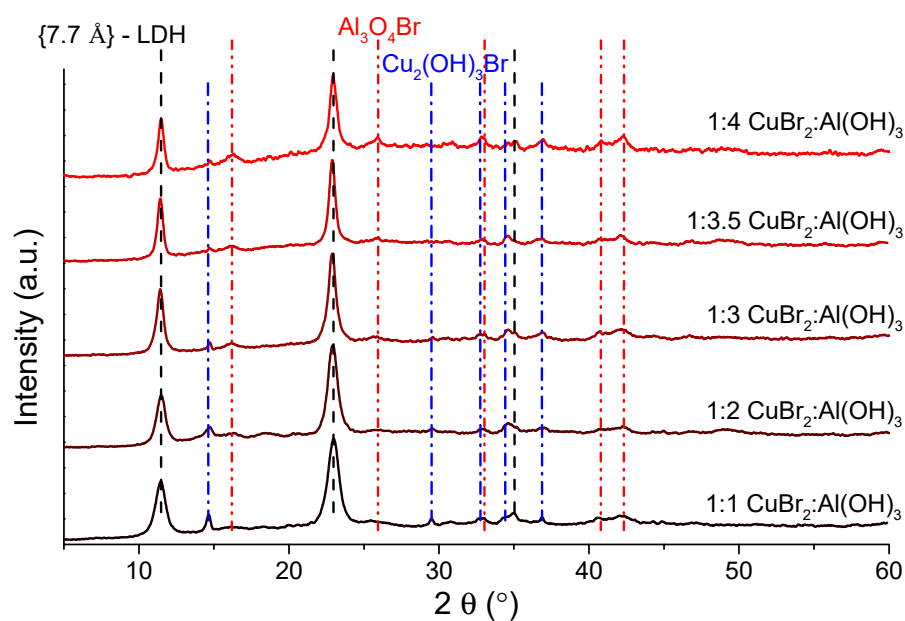

**Figure S2.** XRD patterns of the CuAl<sub>4</sub>-Br-LDH solids obtained using different initial Cu:Al molar ratios (reaction conditions: 96 h stirring, 90 °C, 6 h pre-milling). The basal spacing is shown in curly brackets.

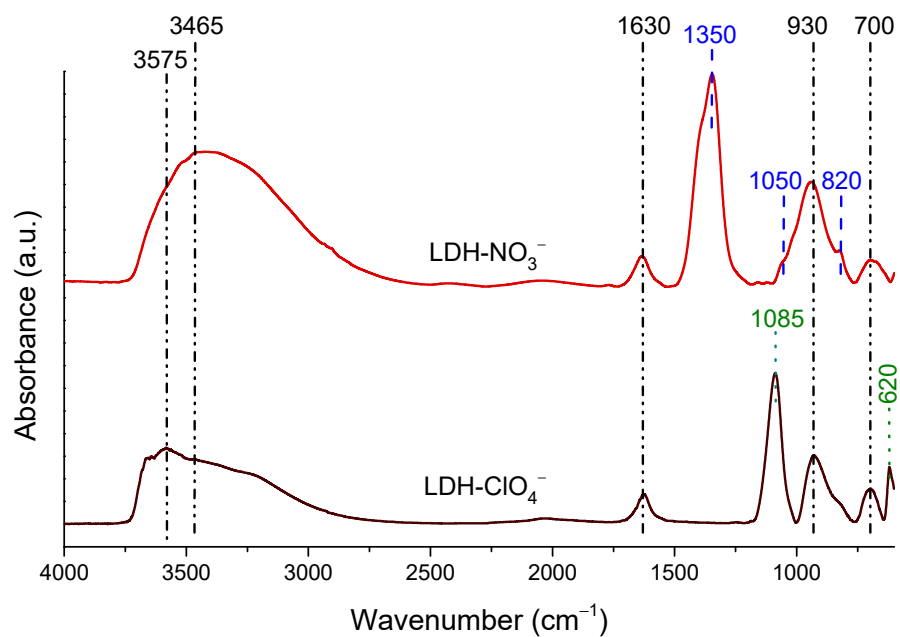

**Figure S3.** Infrared spectra of the CuAl<sub>4</sub>-LDHs, prepared with nitrate and perchlorate interlayer anions.

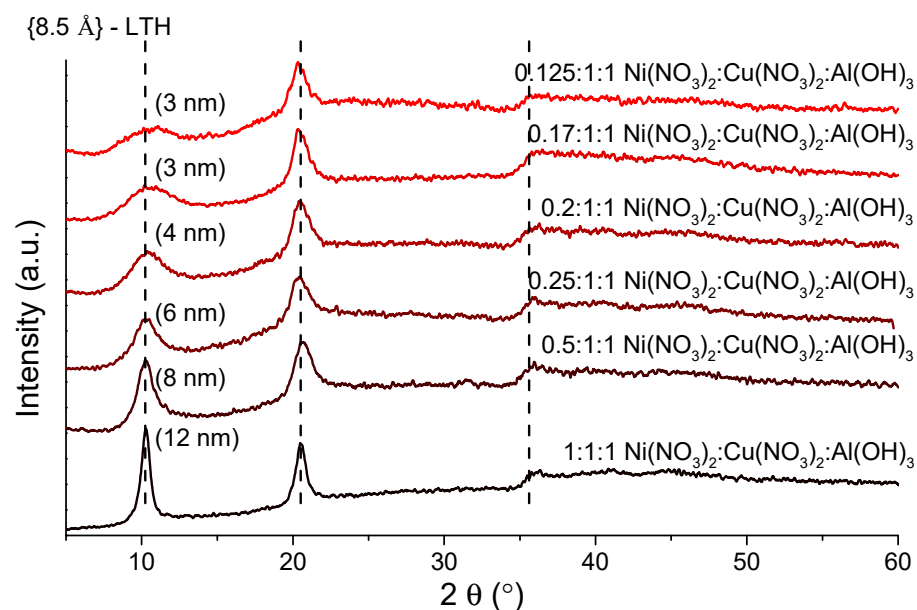

**Figure S4.** X-ray diffraction traces of the NiCuAl<sub>4</sub>-NO<sub>3</sub><sup>-</sup>-LTH solids, with various initial Ni:Cu molar ratios (gradual decrease of the added Ni(II) amount, crystallite thicknesses shown in nm, reaction conditions: 96 h stirring period, 90 °C, 6 h pre-milling). The basal spacing is shown in curly brackets.

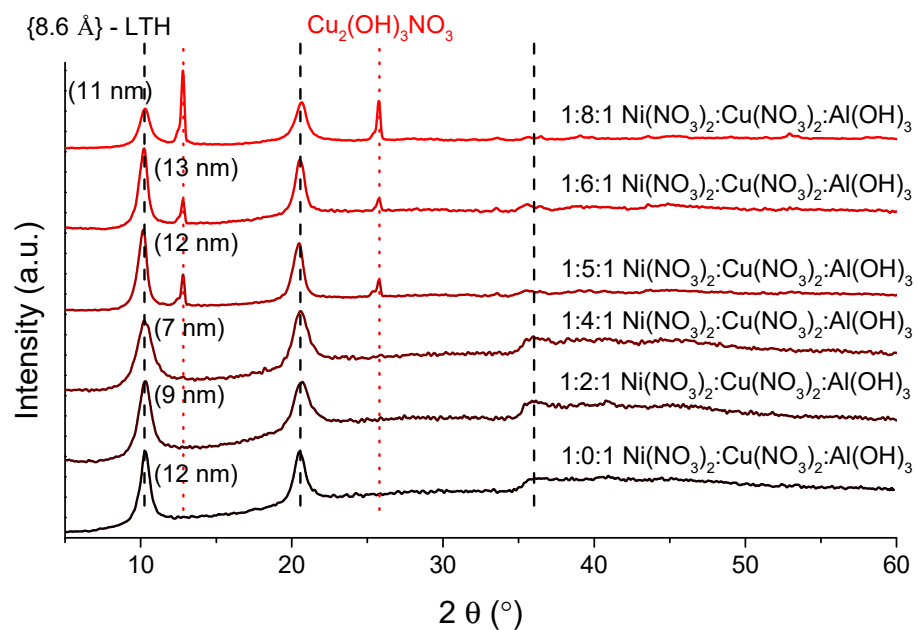

**Figure S5.** XRD patterns of the NiCuAl<sub>4</sub>-NO<sub>3</sub><sup>-</sup>-LTH materials, with different initial Ni:Cu molar ratios (gradual increase of the added Cu(II) concentration, crystallite thicknesses denoted in nm, reaction conditions: 96 h stirring period, 90 °C, 6 h pre-milling). The basal spacing is shown in curly brackets.

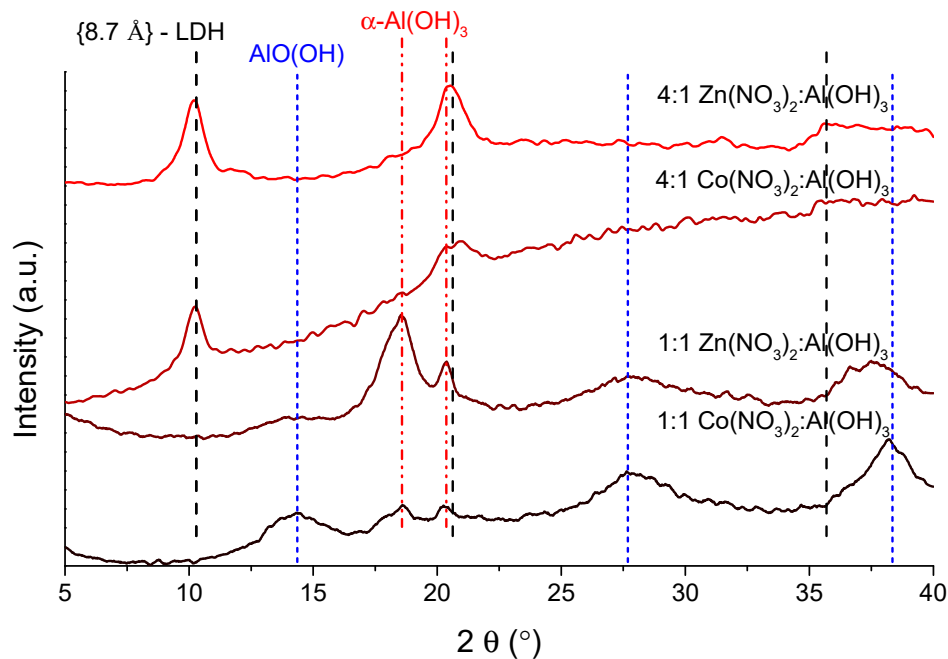

**Figure S6.** XRD curves of the CoAl<sub>4</sub>- and ZnAl<sub>4</sub>-NO<sub>3</sub>-LDHs, with different initial Co/Zn:Al molar ratios (reaction conditions: 96 h stirring period, 90 °C, 6 h pre-milling). The basal spacing is shown in curly brackets.

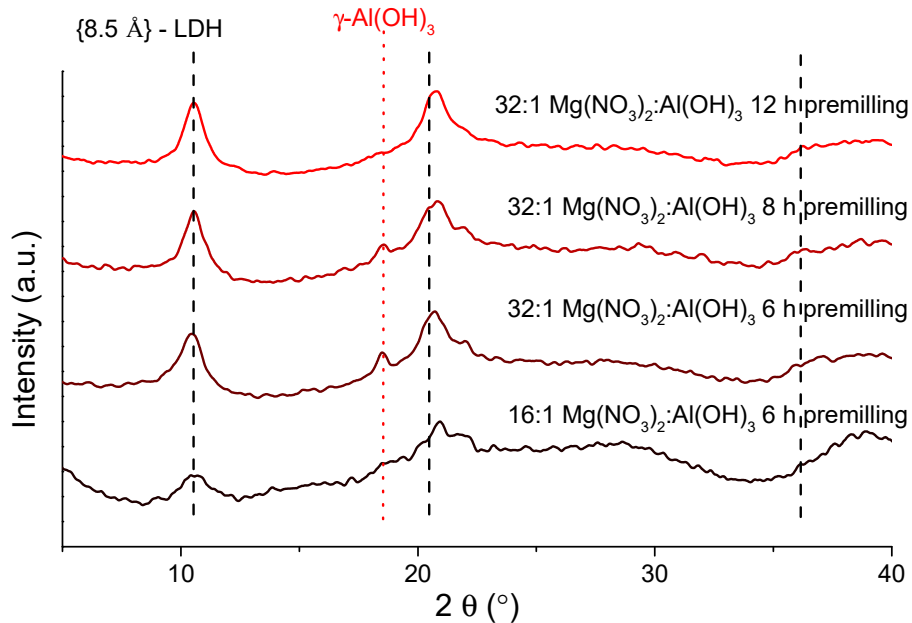

**Figure S7.** XRD patterns of the MgAl<sub>4</sub>-NO<sub>3</sub>-LDH solids, with various milling times and initial Mg:Al molar ratios (reaction conditions: 96 h stirring period, 90 °C). The basal spacing is shown in curly brackets.

**Table S1.** The molar ratios of the incorporated metal ions into the gibbsite structure; the initial and the measured values in the formed LTHs/LMHs are shown with perchlorate interlamellar anions.

| Samples (LDH-ClO <sub>4</sub> ) | Initial Molar Ratios <sup>1</sup> |    |    |    |    | Measured Molar Ratios |       |    |      |      |
|---------------------------------|-----------------------------------|----|----|----|----|-----------------------|-------|----|------|------|
|                                 | Mg                                | Ni | Co | Cu | Zn | Mg                    | Ni    | Co | Cu   | Zn   |
| NiCu-Al                         | -                                 | 2  | -  | 2  | -  | -                     | 4.32  | -  | 1    | -    |
|                                 | -                                 | 1  | -  | 2  | -  | -                     | 2.51  | -  | 1    | -    |
|                                 | -                                 | 1  | -  | 4  | -  | -                     | 1.48  | -  | 1    | -    |
| NiCo-Al                         | -                                 | 2  | 2  | -  | -  | -                     | 20.70 | 1  | -    | -    |
| NiZn-Al                         | -                                 | 2  | -  | -  | 2  | -                     | 15.16 | -  | -    | 1    |
| CoCu-Al                         | -                                 | -  | 2  | 2  | -  | -                     | -     | 1  | 7.27 | -    |
| CuZn-Al                         | -                                 | -  | -  | 2  | 2  | -                     | -     | -  | 5.63 | 1    |
| NiCoCu-Al                       | -                                 | 2  | 2  | 2  | -  | -                     | 20.89 | 1  | 8.27 | -    |
| NiCoCuZn-Al                     | -                                 | 2  | 2  | 2  | 2  | -                     | 15.20 | 1  | 4.81 | 1.15 |
| MgNiCoZnCu-Al                   | 2                                 | 2  | 2  | 2  | 2  | 0.04                  | 16.83 | 1  | 4.83 | 1.22 |

<sup>1</sup> The initial molar ratio of the aluminum was at 1 in every case.

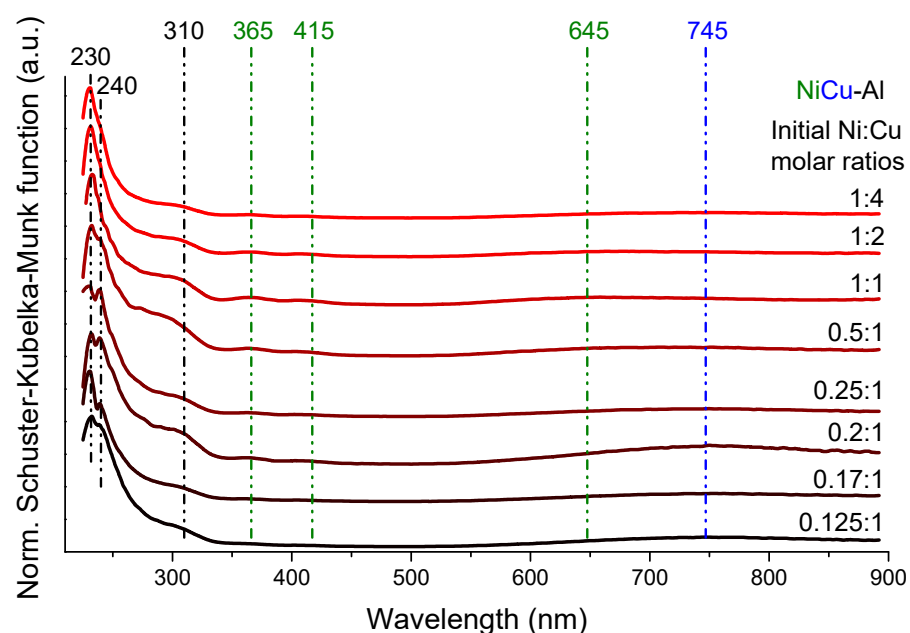**Figure S8.** UV-Vis diffuse reflection spectra of the NiCuAl-LTHs, prepared with various initial Ni:Cu molar ratios.

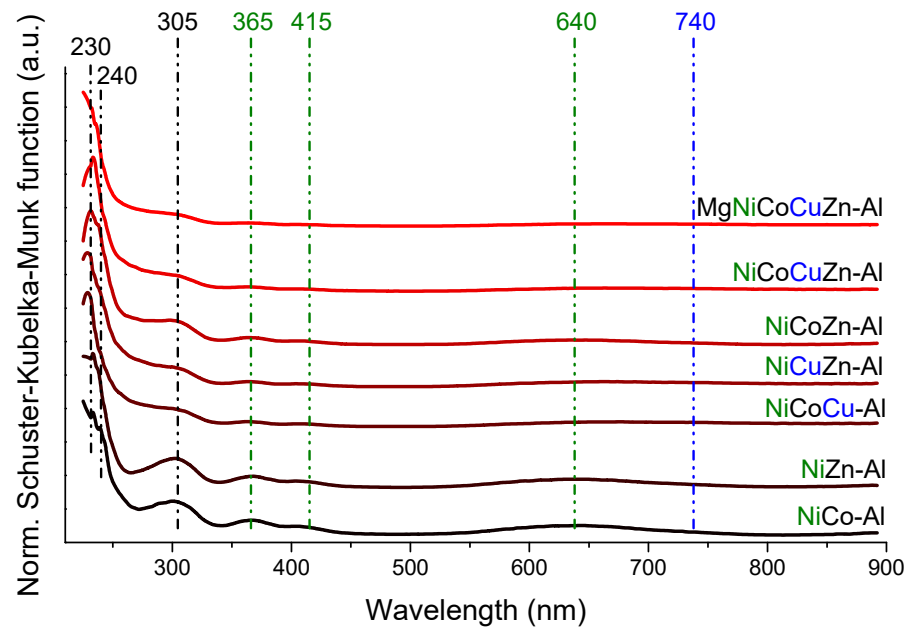

Figure S9. UV-Vis diffuse reflection spectra of nickel-containing LTHs/LMHs.

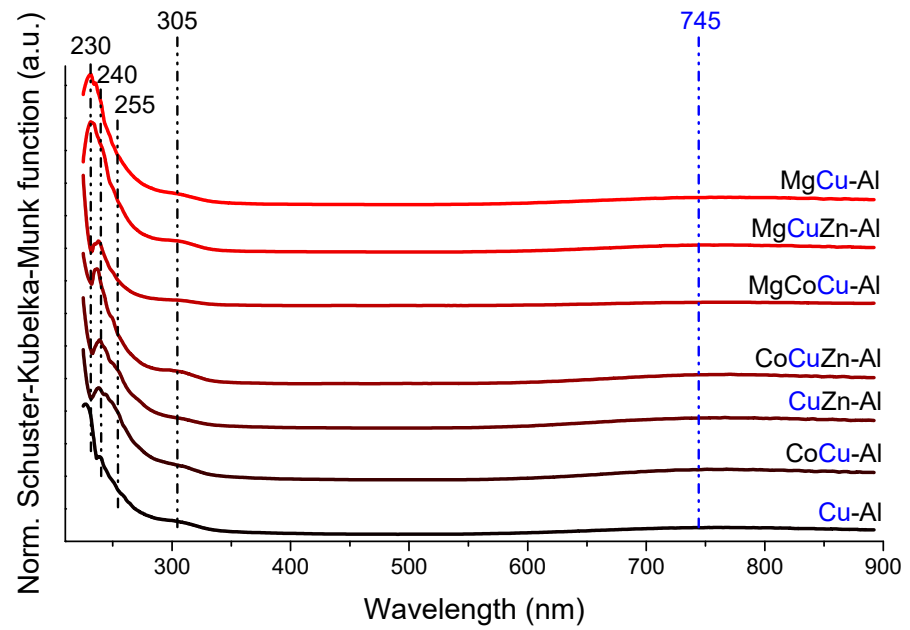

Figure S10. UV-Vis-DR spectra of copper-containing materials.

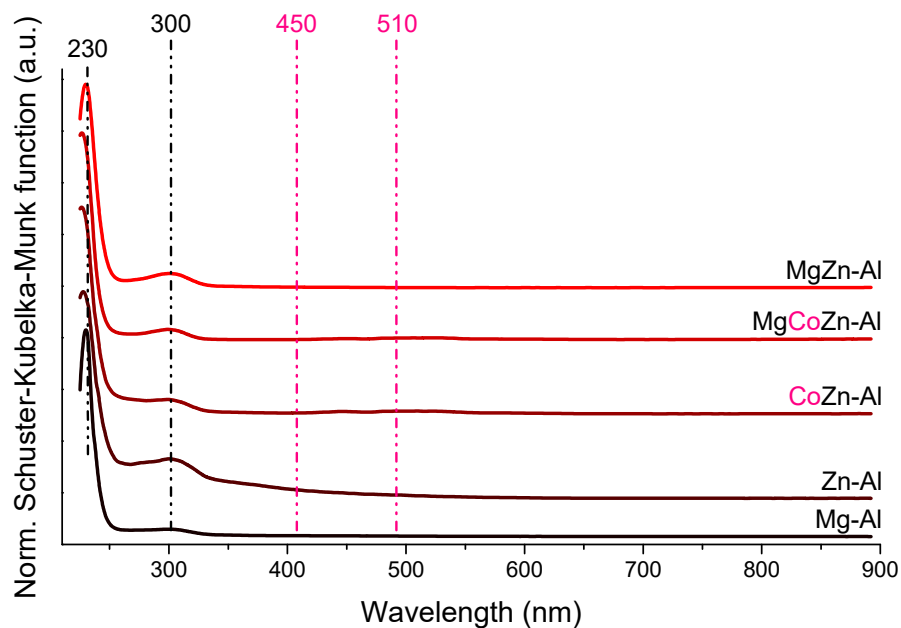

Figure S11. UV-Vis diffuse reflection spectra of zinc-containing solids and the MgAl<sub>4</sub>-LDH.

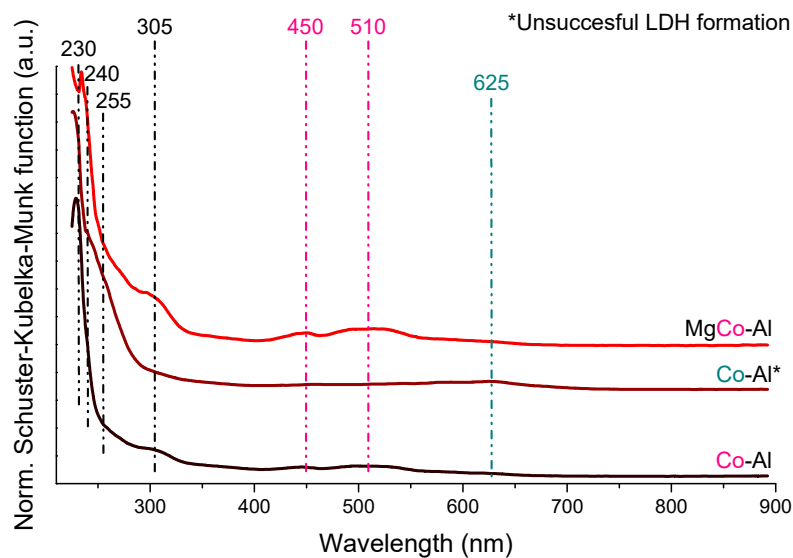

Figure S12. UV-Vis-DR spectra of cobalt-containing samples; for the failed CoAl-LDH synthesis (marked with an asterisk), the reaction conditions were the following: 1:1 initial Co:Al molar ratio, 96 h stirring period, 90 °C, 6 h pre-milling.

Table S2. Optical properties of the prepared LDHs.

| Samples                        | Direct Band Gap (eV) | Indirect Band Gap (eV) |
|--------------------------------|----------------------|------------------------|
| 6 h milled Al(OH) <sub>3</sub> | 5.30                 | 5.11                   |
| NiAl <sub>4</sub> -LDH         | 5.07                 | 4.71                   |
| CuAl <sub>4</sub> -LDH         | 4.79                 | 3.93                   |
| CoAl <sub>4</sub> -LDH         | 5.02                 | 4.67                   |
| ZnAl <sub>4</sub> -LDH         | 4.97                 | 4.53                   |
| MgAl <sub>4</sub> -LDH         | 5.17                 | 4.89                   |

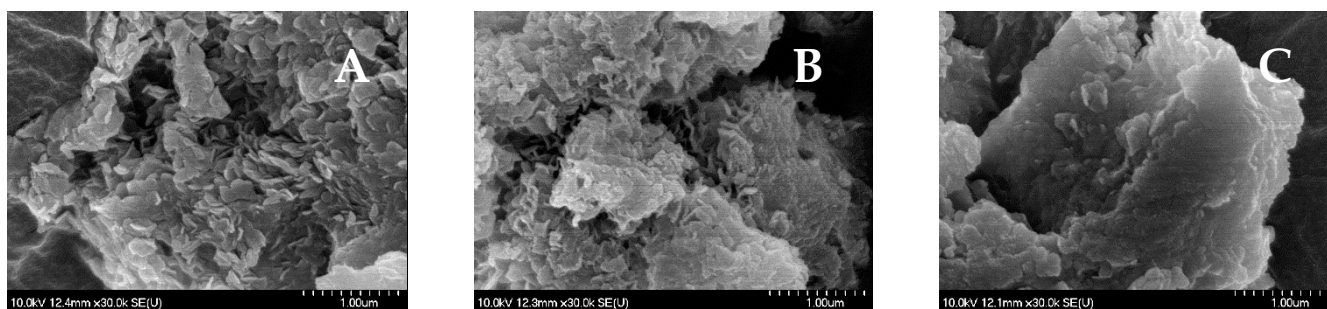

**Figure S13.** SEM images of the ZnAl<sub>4</sub>- (A), MgAl<sub>4</sub>- (B) and CoAl<sub>4</sub>-LDH (C) prepared with nitrate interlamellar anions.

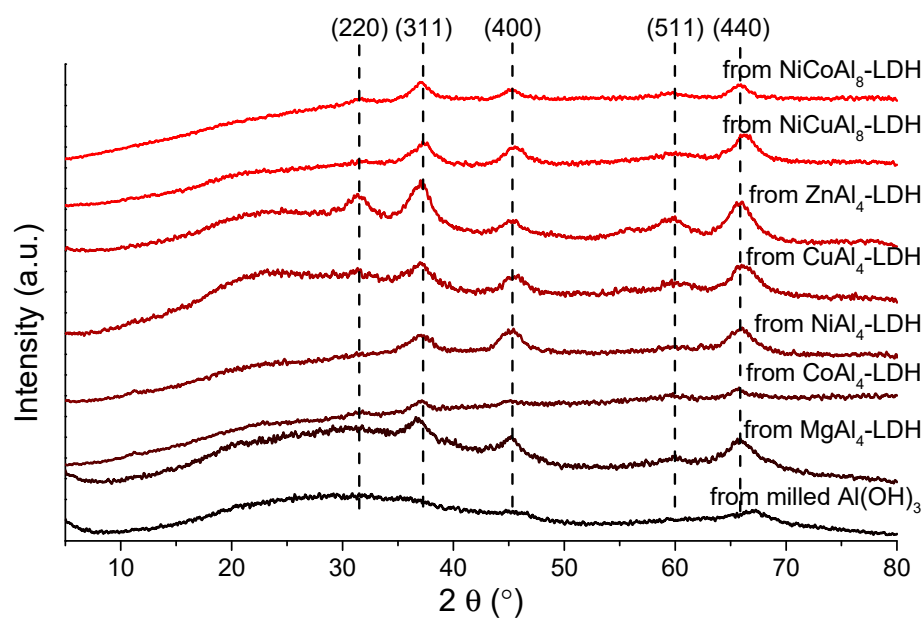

**Figure S14.** Powder X-ray diffraction patterns of the spent catalysts after long-term carbon monoxide oxidation at a 700 °C reaction temperature.



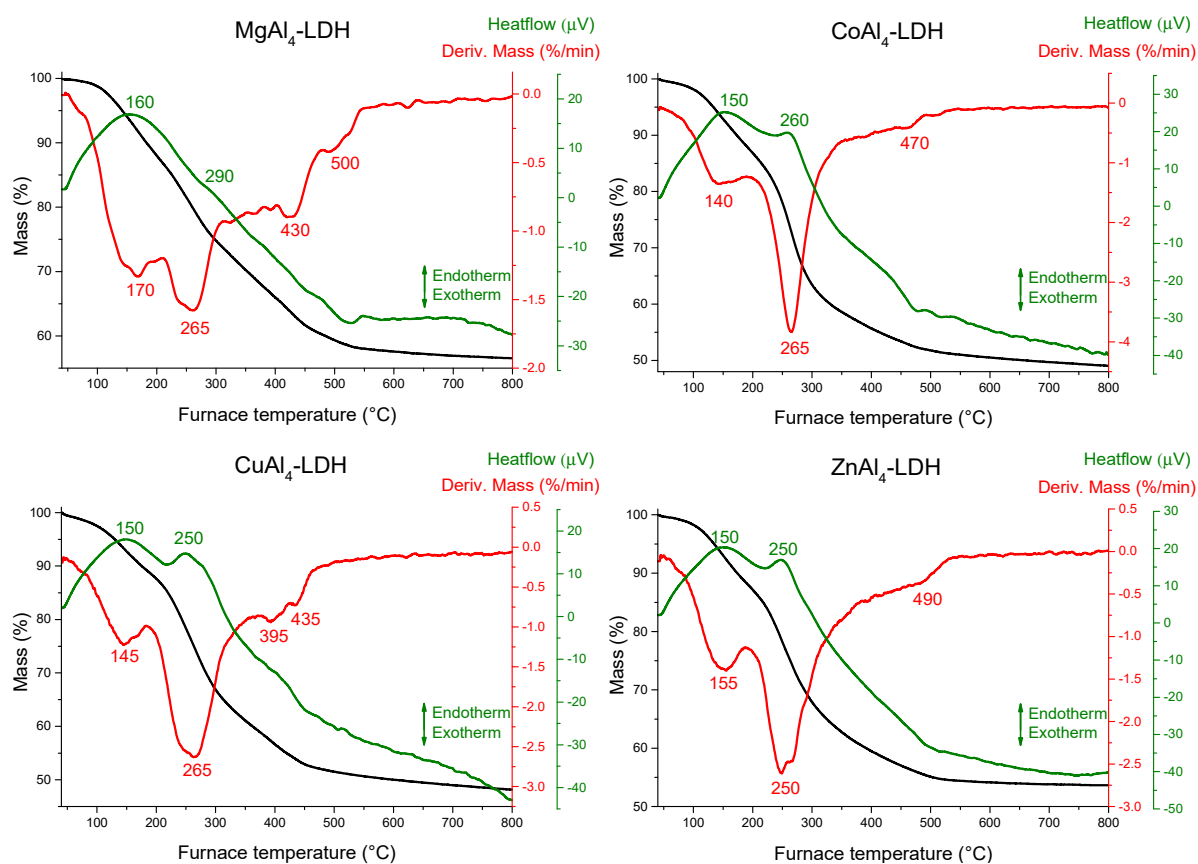

**Figure S15.** Thermogravimetric, derivative thermogravimetric and differential thermal analysis curves of the magnesium-, cobalt-, copper- and zinc-containing LDHs prepared with nitrate interlamellar anions.

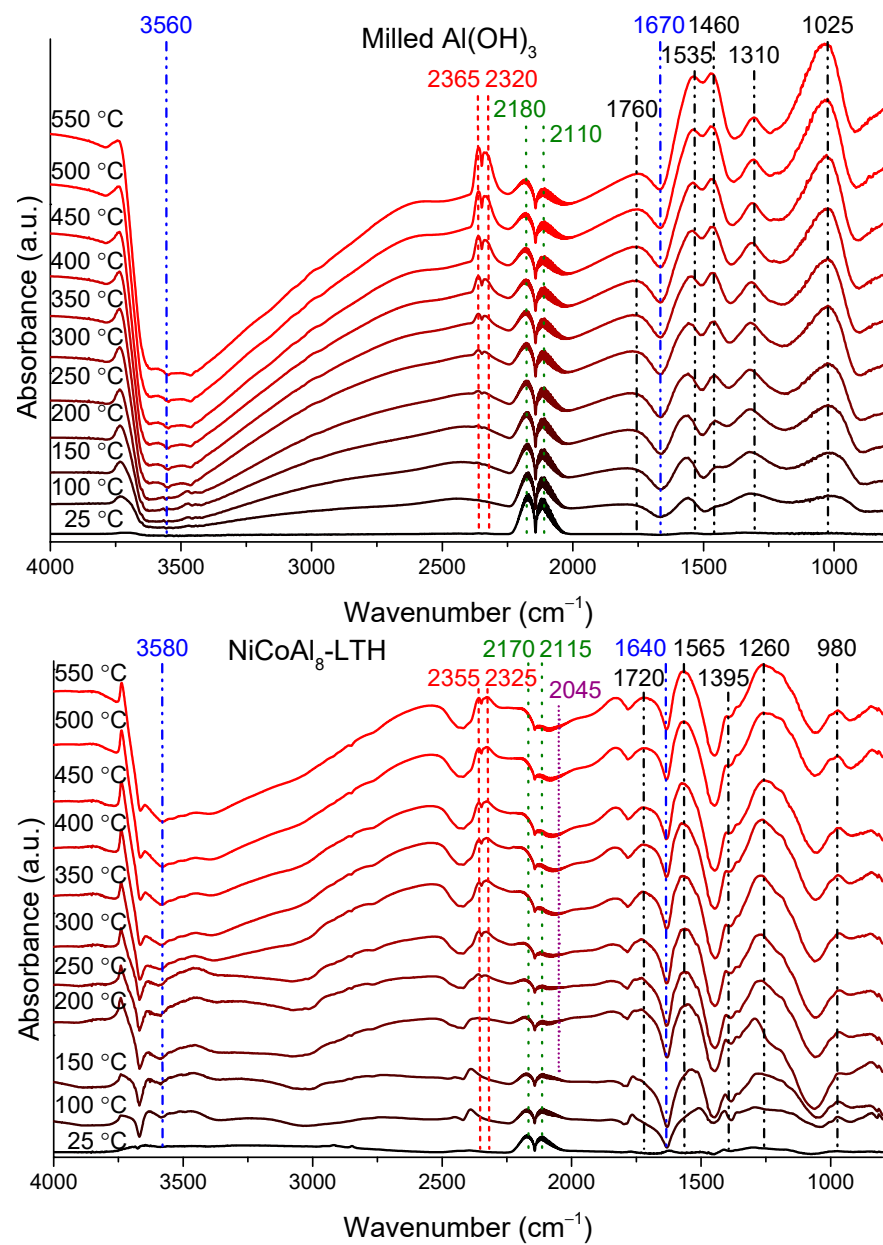

**Figure S16.** DRIFT spectra of the milled  $\text{Al(OH)}_3$  and  $\text{NiCoAl}_8\text{-LTH}$ , heated up to 550 °C in the presence of a carbon monoxide–helium flow.
